# Supplementary material for: The leaf senescence-promoting transcription factor AtNAP activates its direct target gene CYTOKININ OXIDASE 3 to facilitate senescence processes by degrading cytokinins
Source: PubMed Central journal article supplement (PMC10515059; doi:10.1186/s43897-021-00017-6), 2021-10-13
Supplement: 43897_2021_17_MOESM1_ESM.pdf [file 43897_2021_17_MOESM1_ESM.pdf]

Table S1 Primers used in this research

| Primer names | Nucleotide sequences (from 5' to 3') | Purposes                                                                                       |
|--------------|--------------------------------------|------------------------------------------------------------------------------------------------|
| G4010        | CTCGAGTTTTTTGAGAAATAAGTCTTTTT        | Forward primer to clone <i>AtCKX3</i> promoter for Y1H                                         |
| G4011        | GAATTCGTCAAGTTTAACTCTCACAAA          | Reverse primer to clone <i>AtCKX3</i> promoter for Y1H                                         |
| G4036        | GAATTCCTTATGCAGAACCATTTAACTAGTG      | Reverse primer to clone preceding part of <i>AtCKX3</i> promoter without binding motif for Y1H |
| G4037        | CTCGAGTTTCAATAGACCACAAAAGC           | Forward primer to clone latter part of <i>AtCKX3</i> promoter with binding motif for Y1H       |
| G4038        | CTCGAGTCACCTCCAATAAGATCTAAT          | Forward primer to clone <i>AtCKX1</i> promoter for Y1H                                         |
| G4039        | GAATTCCTTCTACTTTGTTGAGAGAAATTGC      | Reverse primer to clone <i>AtCKX1</i> promoter for Y1H                                         |
| G4387        | TCTACATGTCAGTTGATCATTATTGTA          | Reverse primer to clone first part of <i>AtCKX3</i> promoter with transversion mutations       |
| G4388        | CAACTGACATGTAGAATCTAATTAGCAAACC      | Forward primer to clone second part of <i>AtCKX3</i> promoter with transversion mutations      |
| G4389        | TCITTTGATCATTTCATTGTA                | Reverse primer to clone first part of <i>AtCKX3</i> promoter with deletion mutations           |
| G4390        | CAAAGAATCTAATTAGCAAACC               | Forward primer to clone second part of <i>AtCKX3</i> promoter with deletion mutations          |
| G3947        | CCATGGTTTTTTTGAGAAATAAGTC            | Forward primer to clone <i>AtCKX3</i> promoter for GUS assay                                   |
| G3948        | CTGCAGGTTTGAATATTCATAGAA             | Reverse primer to clone <i>AtCKX3</i> promoter for GUS assay                                   |
| G4042        | GGTACCCTAACTCGAGTTTATTTTTGA          | Forward primer to clone <i>AtCKX3</i> CDS for gene complementary                               |
| G4043        | CTGCAGATGGCGAGTTATAATCTTC            | Reverse primer to clone <i>AtCKX3</i> CDS for gene complementary                               |
| G4044        | CTGCAGTTTTTTTGAGAAATAAGTCTTTT        | Forward primer to clone <i>AtCKX3</i> promoter for gene complementary                          |
| G4045        | AAGCTTAGATCGTAAAAATATTTCAACAGGTA     | Reverse primer to clone <i>AtCKX3</i> promoter for gene complementary                          |
| G3945        | ACTAGTATGGCGAGTTATAATCTTCGTTT        | Forward primer to clone <i>AtCKX3</i> CDS for DEX induced expression                           |
| G3946        | CTGCAGCTAACTCGAGTTTATTTTTTG          | Reverse primer to clone <i>AtCKX3</i> CDS for DEX induced expression                           |
| G3897        | TTTAATGCGTCTACGTTTACAACC             | Forward primer to identify <i>atck3</i> knockout mutation                                      |
| G3898        | ACTCTTCATTGATAAGAATCAAGCT            | Reverse primer to identify <i>atck3</i> knockout mutation                                      |
| G3899        | TATGAATCGCAACAAGTGAATG               | Forward primer to test transcription of <i>AtCKX3</i> for qPCR                                 |
| G3900        | CCTCGACCAAAAATGTCTAACC               | Reverse primer to test transcription of <i>AtCKX3</i> for qPCR                                 |
| Actin2 F     | AGTGGTCGTACAACCGGTATTGT              | Forward primer to test transcription of <i>Actin2</i> for qPCR                                 |
| Actin2 R     | GATGGCATGAGGAAGAGAGAAAC              | Reverse primer to test transcription of <i>Actin2</i> for qPCR                                 |
| G3149        | CGTAAAGCATCAACGAAACG                 | Forward primer to test transcription of <i>AtNAP</i> for qPCR                                  |
| G3835        | TGGAAGTTTCATCGACGTCAT                | Reverse primer to test transcription of <i>AtNAP</i> for qPCR                                  |
| G4150        | TTCTTGGCGGGCTTGGAC                   | Forward primer to test transcription of <i>AtCKX1</i> for qPCR                                 |
| G4151        | GACTTGAATCTGCTTGCCTGTG               | Reverse primer to test transcription of <i>AtCKX1</i> for qPCR                                 |
| G4152        | CTTGTCTTTTGAACCACCACG                | Forward primer to test transcription of <i>AtCKX2</i> for qPCR                                 |
| G4153        | CATCATCTCCGAGCCTCT                   | Reverse primer to test transcription of <i>AtCKX2</i> for qPCR                                 |
| G4154        | CCGTCCTCGCCCTTCT                     | Forward primer to test transcription of <i>AtCKX4</i> for qPCR                                 |
| G4155        | CCCGTCTGCCGAGATAACAA                 | Reverse primer to test transcription of <i>AtCKX4</i> for qPCR                                 |
| G4156        | TCTCCACCCATACATCCACA                 | Forward primer to test transcription of <i>AtCKX5</i> for qPCR                                 |
| G4157        | CCCTCCGACTTAGCCTCC                   | Reverse primer to test transcription of <i>AtCKX5</i> for qPCR                                 |
| G4158        | GCCCAGTCATCGTCTACCCA                 | Forward primer to test transcription of <i>AtCKX6</i> for qPCR                                 |
| G4159        | CCCCACTTGTCCCGAAA                    | Reverse primer to test transcription of <i>AtCKX6</i> for qPCR                                 |
